# Supplementary material for: Strain-engineering the electronic properties and anisotropy of GeSe2 monolayers
Source: Royal Society of Chemistry journal article supplement (doi:10.1039/c8ra06606j), 2018-01-01
Supplement: c8ra06606j1.pdf [file c8ra06606j1.pdf]

## **Electronic Supplementary Information**

### **Strain-engineering the electronic properties and anisotropy of GeSe<sub>2</sub> monolayer**

Zong-Bao Li,<sup>a</sup> Xia Wang,<sup>a</sup> Wei Shi,<sup>a</sup> Xiao-bo Xing<sup>b</sup>, Ding-Jiang Xue<sup>\*c</sup>, and Jin-Song Hu<sup>c</sup>

<sup>a</sup>School of Material and Chemical Engineering, Tongren University, Tongren 554300, China

<sup>b</sup>MOE Key Laboratory of Laser Life Science & Institute of Laser Life Science, College of Biophotonics, South China Normal University, Guangzhou 510631, China

<sup>c</sup>CAS Key Laboratory of Molecular Nanostructure and Nanotechnology, Beijing National Research Center for Molecular Sciences, CAS Research/Education Center for Excellence in Molecule Science, Institute of Chemistry, Chinese Academy of Sciences, Beijing 100190, China

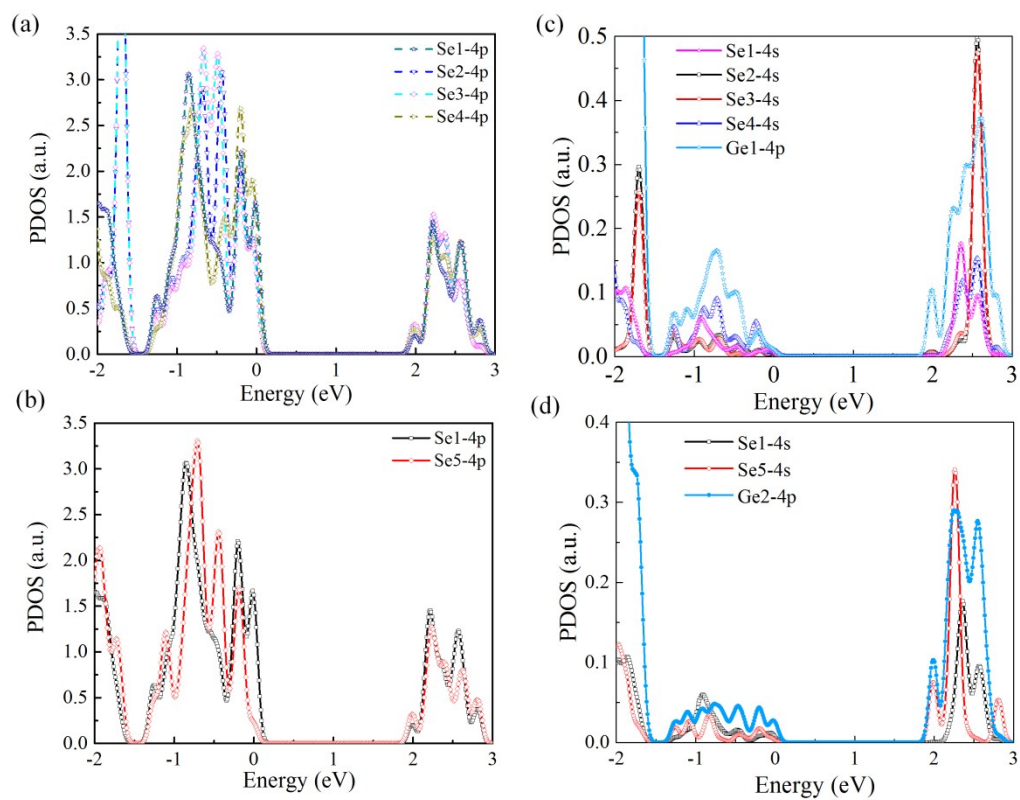

Fig. S1 PDOSs of different atoms in  $\text{GeSe}_2$

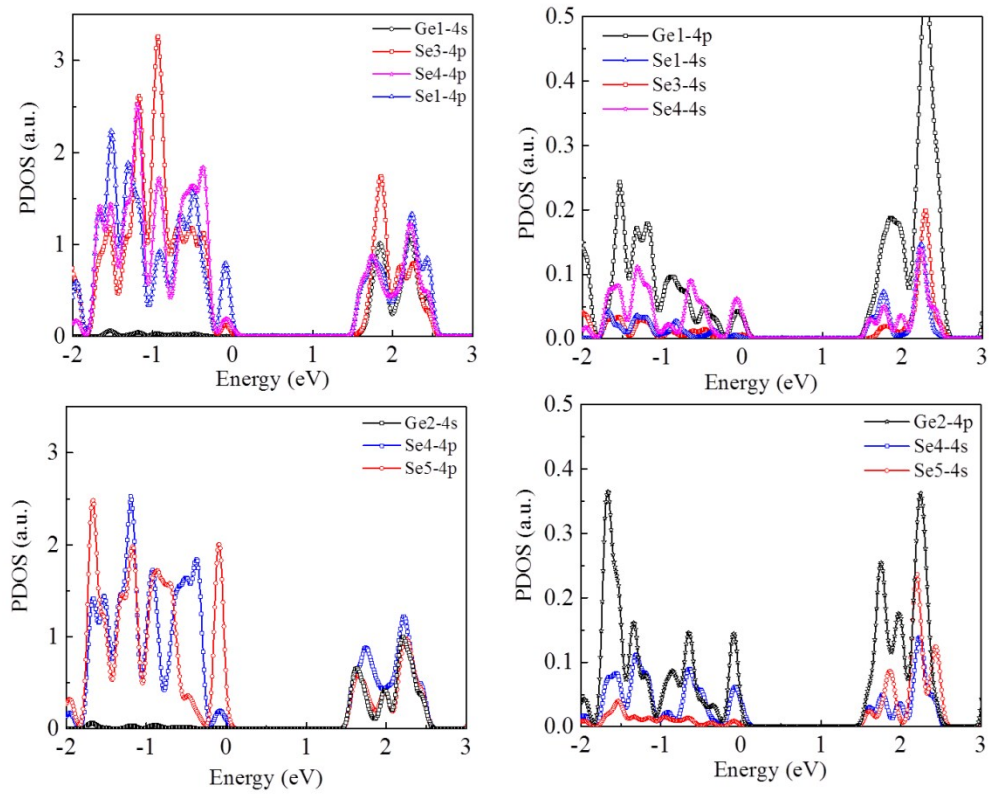

Fig. S2 PDOSs of the main atoms states under strain  $\varepsilon_y = -12\%$

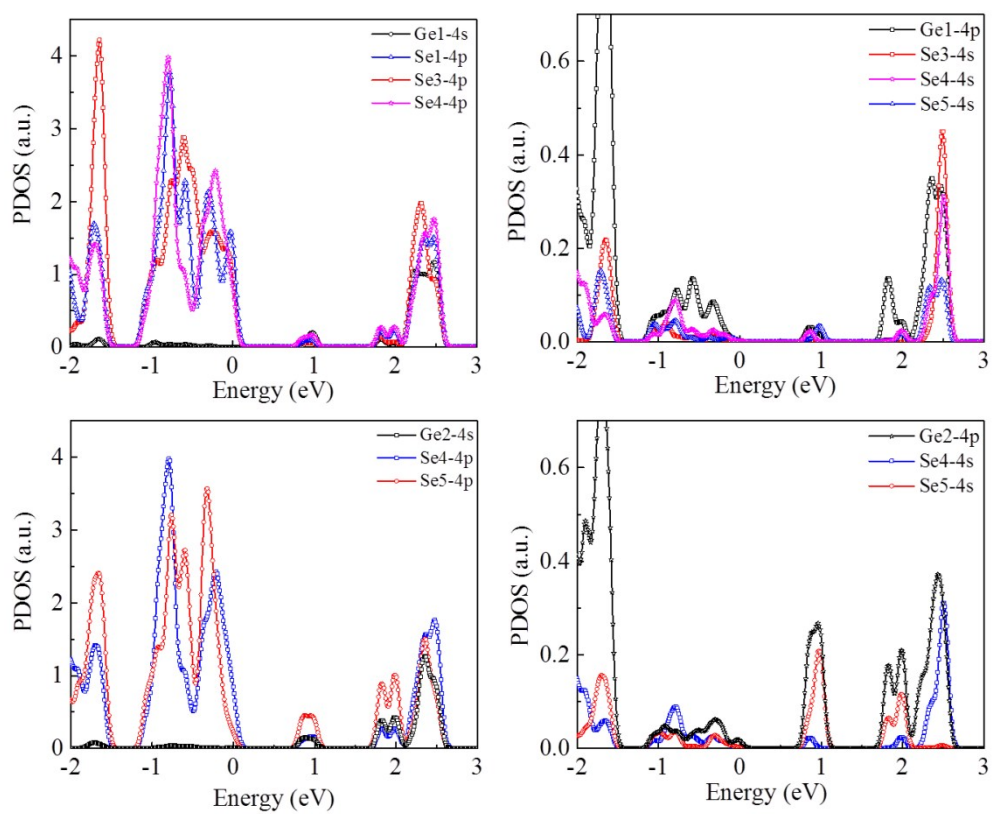

Fig. S3 PDOSs of the main atoms states under strain  $\epsilon_y = 12\%$

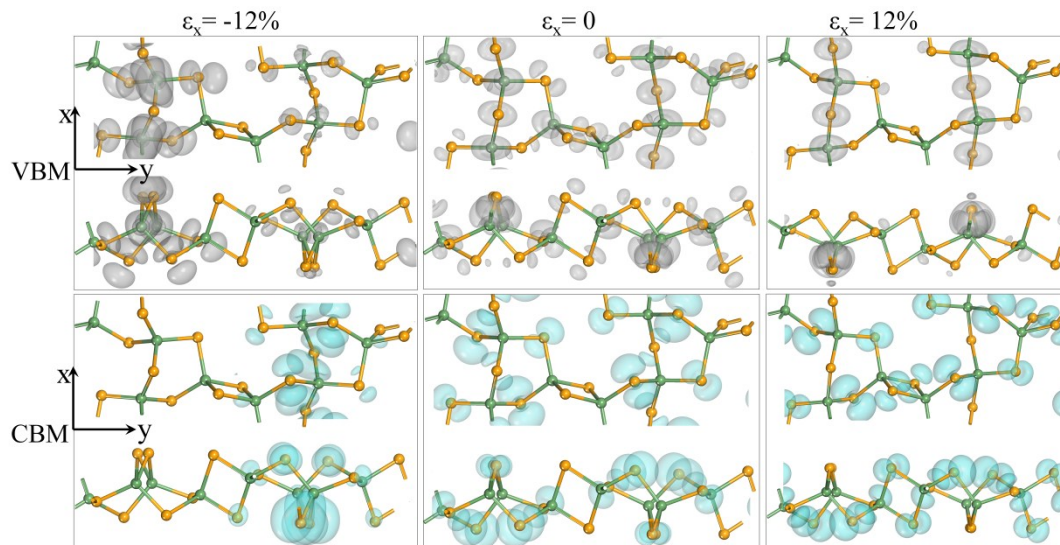

Fig. S4 The charge density contour plots of the VBM and CBM in GeSe<sub>2</sub> monolayer under different strains of  $\epsilon_x=12\%$  and  $\epsilon_x=-12\%$ . The isovalue is same.
